# Supplementary material for: The transcription factor Vezf1 represses the expression of the antiangiogenic factor Cited2 in endothelial cells
Source: PubMed Central journal article supplement (PMC6052231; doi:10.1074/jbc.ra118.002911), 2018-05-24
Supplement: supp_RA118.002911_136674_2_supp_140936_p8z452.pdf [file supp_RA118.002911_136674_2_supp_140936_p8z452.pdf]

**SUPPLEMENTARY INFORMATION**

The transcription factor Vezf1 represses the expression of the antiangiogenic factor Cited2 in endothelial cells

**Lama AlAbdi<sup>A</sup>, Ming He<sup>A</sup>, Qianyi Yang<sup>#</sup>, Allison B. Norvil and Humaira Gowher<sup>1, 2\*</sup>**

**List of materials:**

Supplementary Figure S1

Table S1

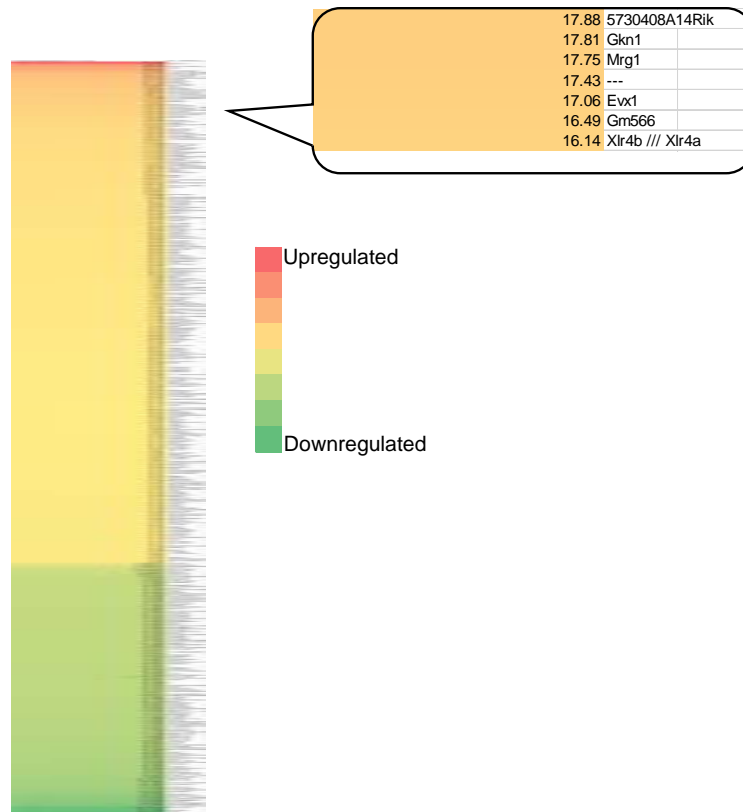

**Figure S1.** RNA was purified from WT and *Vezf1*<sup>-/-</sup> ESCs and oligonucleotide analysis using the Affymetrix platform, were done according to the manufacturer's instructions (Affymetrix, Santa Clara, CA). The full protocol can be found at [http://www.affymetrix.com/support/technical/manual/expression\\_manual.affx](http://www.affymetrix.com/support/technical/manual/expression_manual.affx). Microarray analysis was performed at the NIDDK microarray core facility, NIH, Bethesda MD. Briefly, RNA extraction from cultured ESCs was performed using the TriZol (Invitrogen, Carlsbad, CA) and RNeasy (Qiagen, Valencia, CA). Twenty micrograms of purified RNA was used as a template for double-stranded cDNA synthesis. It was then hybridized to Affymetrix mouse genome arrays. Affymetrix probe sets with “Absent Calls” were eliminated from further statistical analysis. An ANOVA model with log (base 2) of the Affymetrix signal as a response was fitted for each one of the remaining Affymetrix probe sets. The signals from *Vezf1*<sup>-/-</sup> RNA were compared to that of WT and fold change was calculated using ANOVA4. The upper threshold of the p-value used for measuring the significance was set to 10<sup>-2</sup>. Genes whose expression increased or decreased by more than 5 fold in *Vezf1*<sup>-/-</sup> ESC compared to WT were sorted (p-value ranging from 10<sup>-8</sup> to 10<sup>-3</sup>). Two probes for *Mrg1/Cited2* showed 17 and 5 fold increase in expression in the *Vezf1*<sup>-/-</sup> ESCs with p-values at 10<sup>-5</sup> and 10<sup>-3</sup> respectively.

**Table S1**

| <b>For Bisulfite PCR:</b> | <b>Primer</b>                      |
|---------------------------|------------------------------------|
| <i>Cited2proBS out F</i>  | TTGTAGAGGGTAGGGTAGATTATTA          |
| <i>Cited2proBS out R</i>  | CCAAACAACCTACCAACAATAAACTATATTT    |
| <i>Cited2proBS In F</i>   | GGGTGGGGAGATTAGTTAGAA              |
| <i>Cited2proBS In R</i>   | AACTTTAACCCTATTAATATAAAAAATCTCAAAA |
| <b>For RT-qPCR:</b>       | <b>Primer</b>                      |
| <i>Cited2 RT F2</i>       | GAAGGACTGGAAATGGCAGACCATATGAT      |
| <i>Cited2 RT R2</i>       | TGGTGCAGCCCGTTGGTG                 |
| <i>Oct3/4 RT F</i>        | TCTTTCACACAGCCCCCGGTC              |
| <i>Oct3/4 RT R</i>        | TGCGGGCGGACATGGGGAGATCC            |
| <i>Gapdh RT F</i>         | CAAAATGGTGAAGGTCGGTGTGAA           |
| <i>Gapdh RT R</i>         | CAACAATCTCCACTTTGCCACTG            |
| <i>VEGFA RT F</i>         | AAGGAGAGCAGAAGTCCCATGA             |
| <i>VEGFA RT R</i>         | CTCAATTGGACGGCAGTAGCT              |
| <i>Flk1 RT F</i>          | TCTGTGGTTCTGCGTGGAGA               |
| <i>Flk1 RT R</i>          | GTATCATTTCACACCACC                 |
| <i>CD31 RT F</i>          | TACTGCAGGCATCGGCAAA                |
| <i>CD31 RT R</i>          | GCATTTGCACACCTGGAT                 |
| <i>Tie2 RT F</i>          | AAGACATACGTGAACACCACACT            |
| <i>Tie2 RT R</i>          | ACTCTAGAGTCAGAACACACTGCAGAT        |
| <i>Hif-1α F</i>           | TCCCAGCATCTATGGCTTGA               |
| <i>Hif-1α R</i>           | GCTGTAACAGGAGAAGGGGG               |
| <i>Flt1 F</i>             | GGGCTTCAGACAGACAGGAC               |
| <i>Flt1 R</i>             | TGCTTGTGGAAGAGCTCACT               |
| <i>Dnmt3b RT F</i>        | ATGGCTCAAAGAATGATAAGCTCG           |
| <i>Dnmt3b RT R</i>        | TCTGCACTTCTTTAACTTGTCTGT           |
| <b>For ChIP:</b>          | <b>Primer</b>                      |
| <i>Cited2 pro 1 F</i>     | TTCTTCATTACAAACCCGTTTGCTTC         |
| <i>Cited2 pro 1 R</i>     | TCTGCTGTTGCCCTTGATCC               |
| <i>Cited2 pro 2 F</i>     | CTAGGTAAGCCGGGTGAGCG               |
| <i>Cited2 pro 2 R</i>     | GCTAGTCCTCCCGGCCAC                 |
| <i>Oct4 pro F</i>         | CCCGTCCTAAGGGTTGTCTT               |
| <i>Oct4 pro R</i>         | GTGGGGGTGGGAGAAACTG                |
| <i>VEGFA pro F</i>        | TCCGCTGAATAGTCTGCCTTG              |
| <i>VEGFA pro R</i>        | GTTACCGGTGAGAAGCGCA                |
| <i>Flk-1 pro F</i>        | ATCGCTGTTTCCAGGCTACG               |
| <i>Flk-1 pro R</i>        | GCGCTGCGACTTTGATACAC               |
